# Supplementary material for: In-depth biological analysis of alteration in Plasmodium knowlesi-infected red blood cells using a noninvasive optical imaging technique
Source: PubMed Central journal article supplement (PMC8889714; doi:10.1186/s13071-022-05182-1), 2022-03-02
Supplement: 13071_2022_5182_MOESM1_ESM.pdf [file 13071_2022_5182_MOESM1_ESM.pdf]

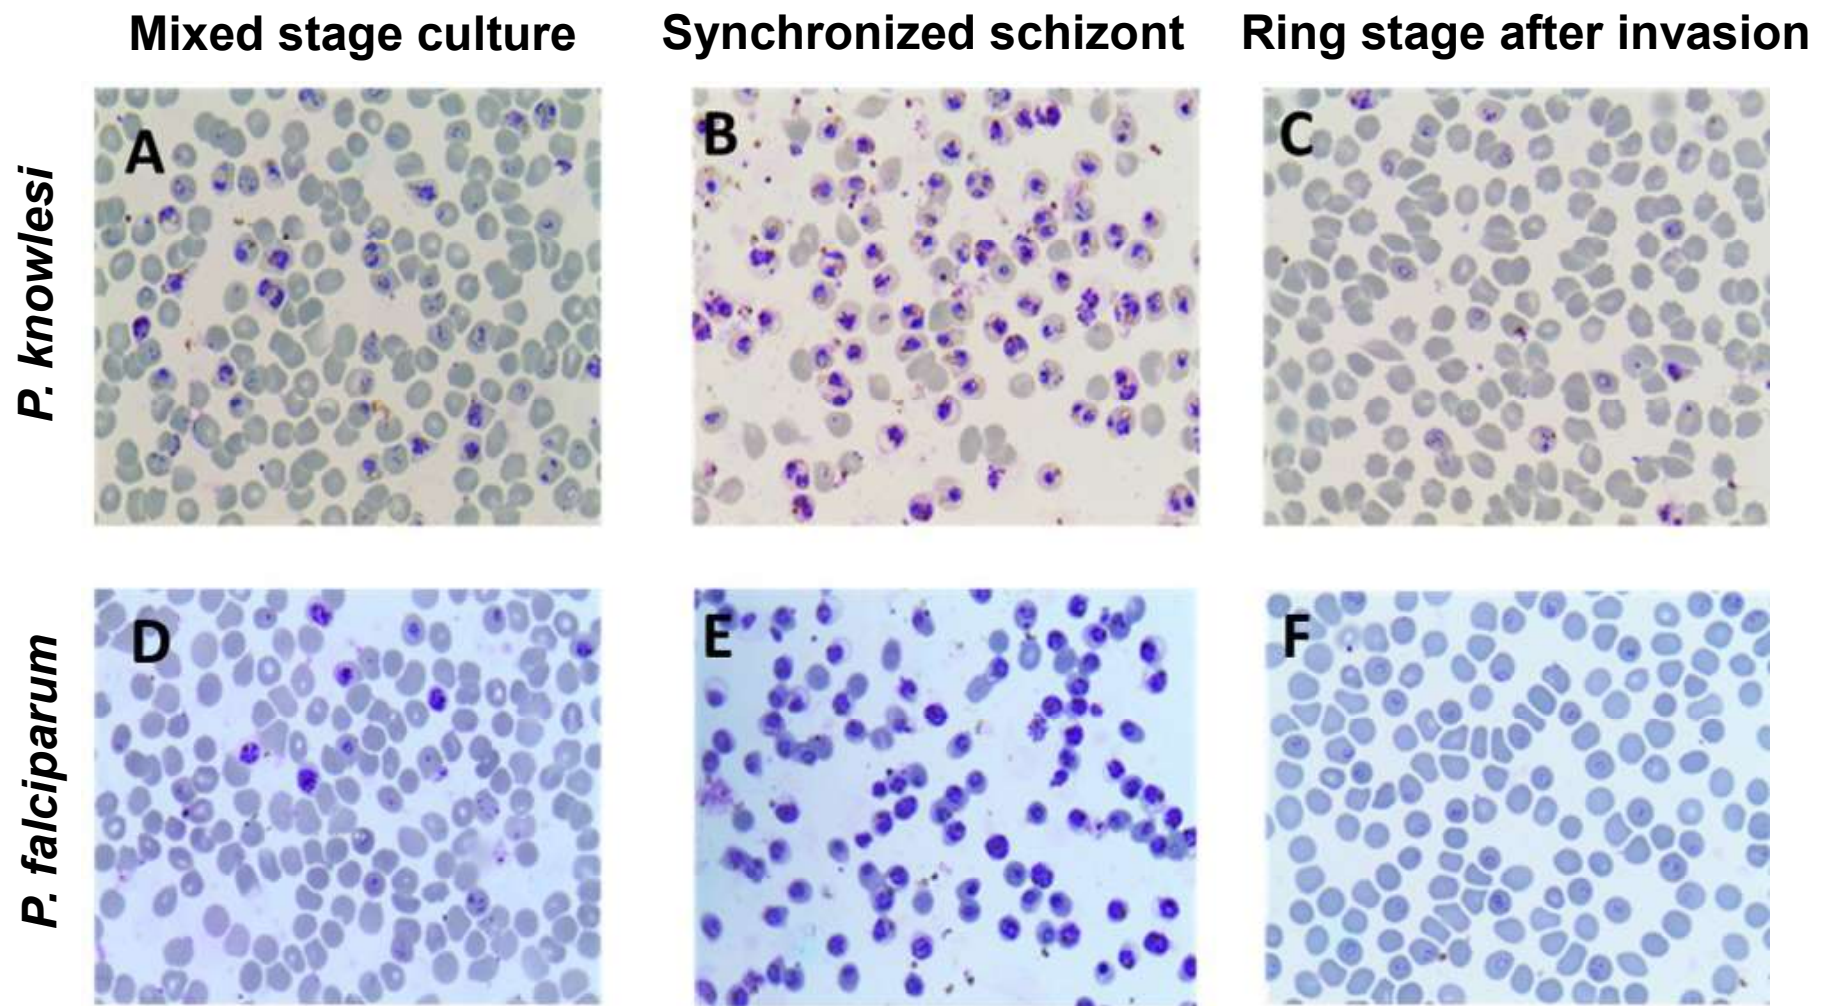

Additional file 1: Figure S1.
